# Supplementary material for: Protonation of Borylated Carboxonium Derivative [2,6-B10H8O2CCH3]−: Theoretical and Experimental Investigation
Source: MDPI journal article supplement (doi:10.3390/ijms23084190), 2022-04-10
Supplement: s1 [file s1]

## Supplementary materials

### Protonation of borylated carboxonium derivative $[2,6\text{-B}_{10}\text{H}_8\text{O}_2\text{CCH}_3]^-$ : theoretical and experimental investigation

Ilya N. Klyukin<sup>1\*</sup>, Anastasia V. Kolbunova<sup>1,2</sup>, Alexander S. Novikov<sup>3</sup>, Aleksey V. Nelyubin<sup>1</sup>, Nikita A. Selivanov<sup>1</sup>, Alexander Yu. Bykov<sup>1</sup>, Alexandra A. Klyukina<sup>4</sup>, Andrey P. Zhdanov<sup>1</sup>, Konstantin Yu. Zhizhin<sup>1,5</sup>, Nikolay T. Kuznetsov<sup>1</sup>

*1) Kurnakov Institute of General and Inorganic Chemistry,  
Russian Academy of Sciences,  
Leninskii pr. 31, 117907, Moscow, Russian Federation;*

*2) Higher School of Economics, Faculty of Chemistry,  
Myasnitskaya yl. 101000, Moscow, Russian Federation;*

*3) Saint Petersburg State University, Institute of Chemistry,  
Universitetskaya Nab. 7-9, 199034, Saint Petersburg, Russian Federation*

*4) Winogradsky Institute of Microbiology, Research Centre of Biotechnology,  
Russian Academy of Sciences,  
60 let Oktjabrja pr-t, 7, bld. 2, 117312 Moscow, Russia.*

*5) MIREA Russian Technological University, Lomonosov Institute of Fine Chemical Technologies, 119571,  
Moscow, Russia*

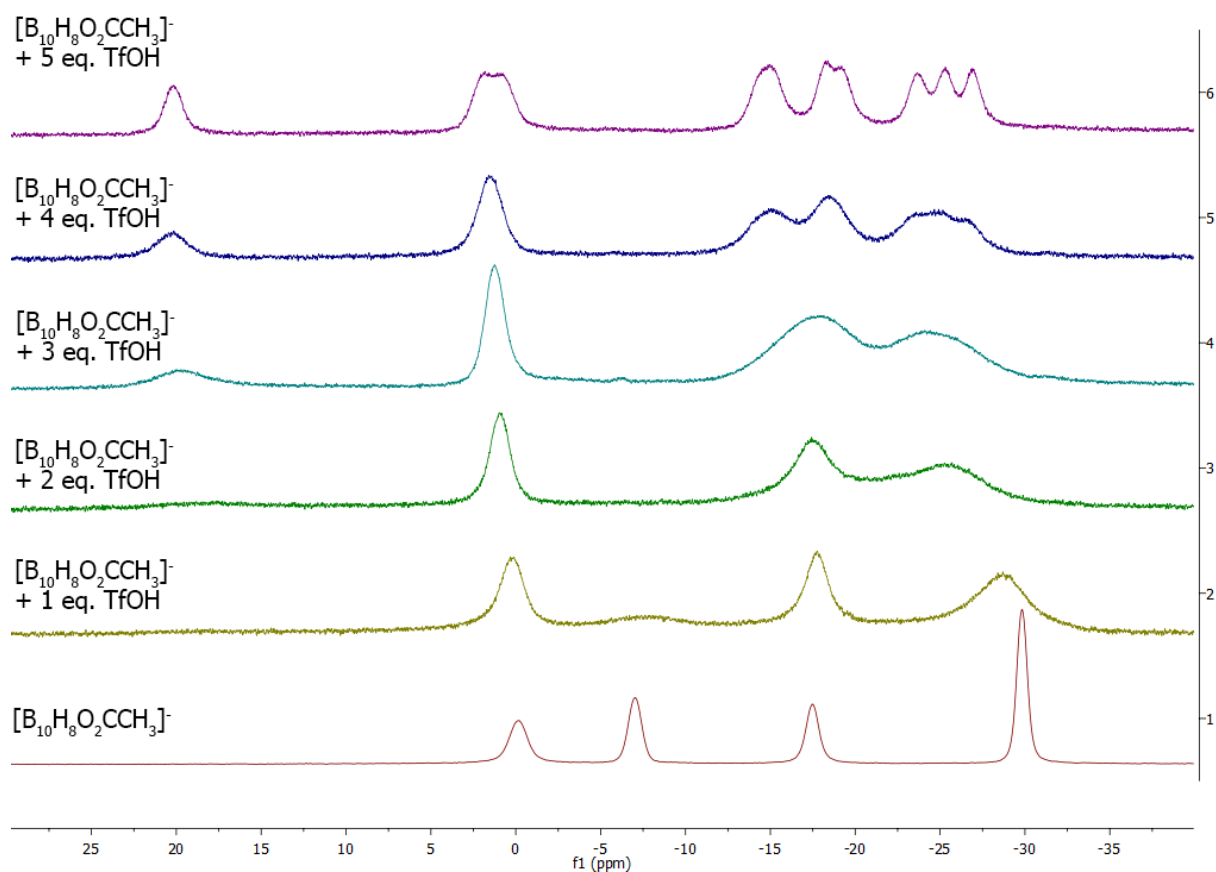

**Figure S1.**  $^{11}\text{B}$ - $^1\text{H}$  spectra of  $[\text{2,6-B}_{10}\text{H}_8\text{O}_2\text{CCH}_3]^-$  with presence of different amount of  $\text{CF}_3\text{SO}_3\text{H}$  acid.

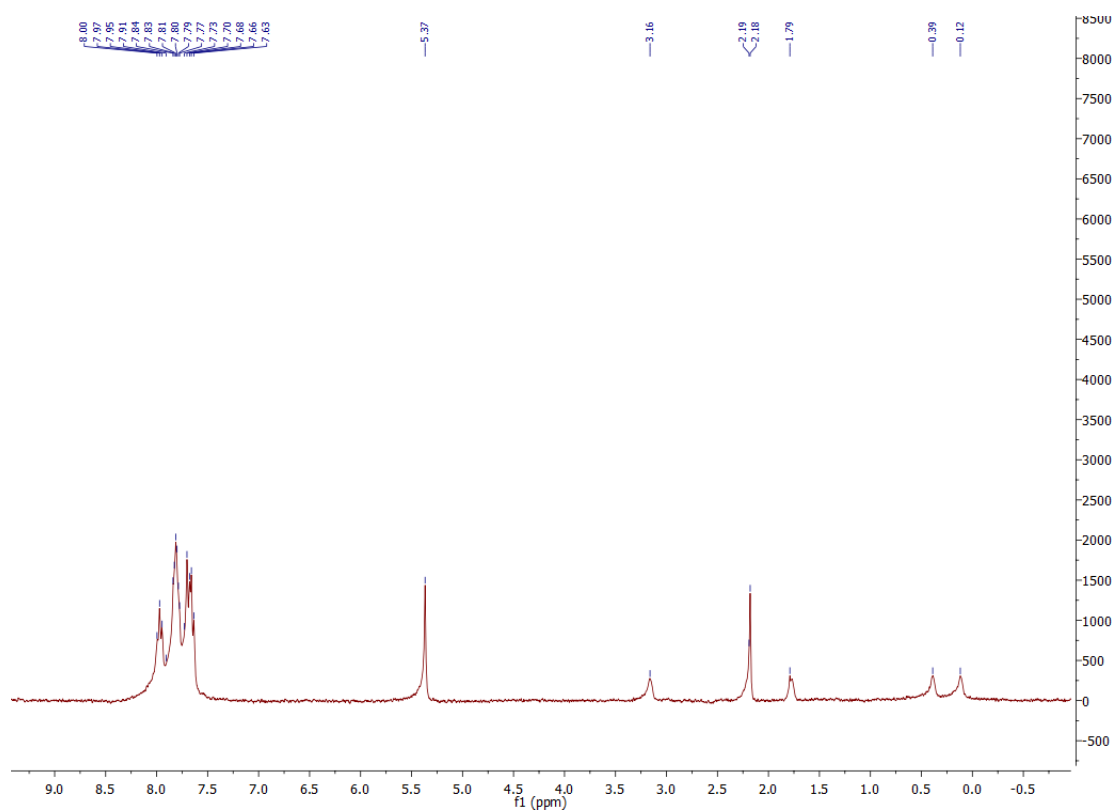

**Figure S2.**  $^1\text{H}$ - $^{11}\text{B}$  spectra of  $[\text{2,6-B}_{10}\text{H}_8\text{O}_2\text{CCH}_3]^-$ .

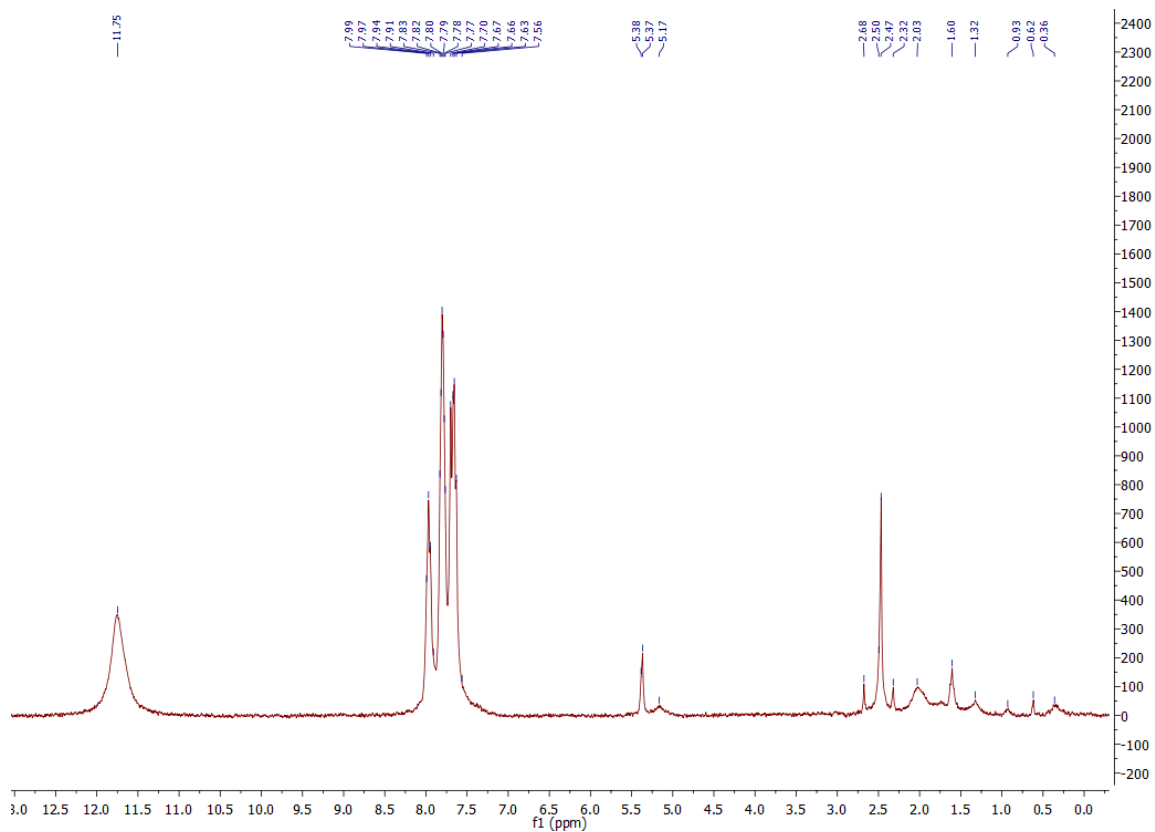

**Figure S3.**  $^1\text{H}$ - $^{11}\text{B}$  spectra of  $[2.6\text{-B}_{10}\text{H}_8\text{O}_2\text{CCH}_3^*\text{H}^{\text{fac}}]^-$ .

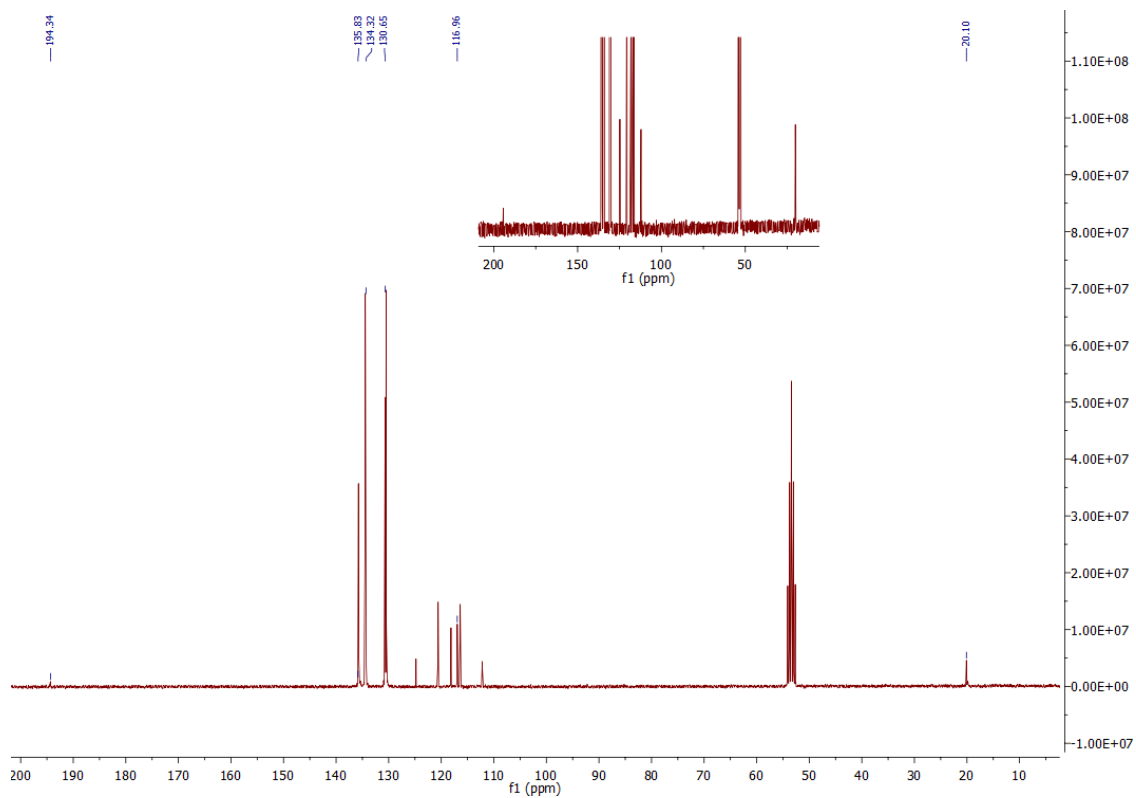

**Figure S4.**  $^{13}\text{C}$  spectra of  $[2.6\text{-B}_{10}\text{H}_8\text{O}_2\text{CCH}_3^*\text{H}^{\text{fac}}]^-$ .

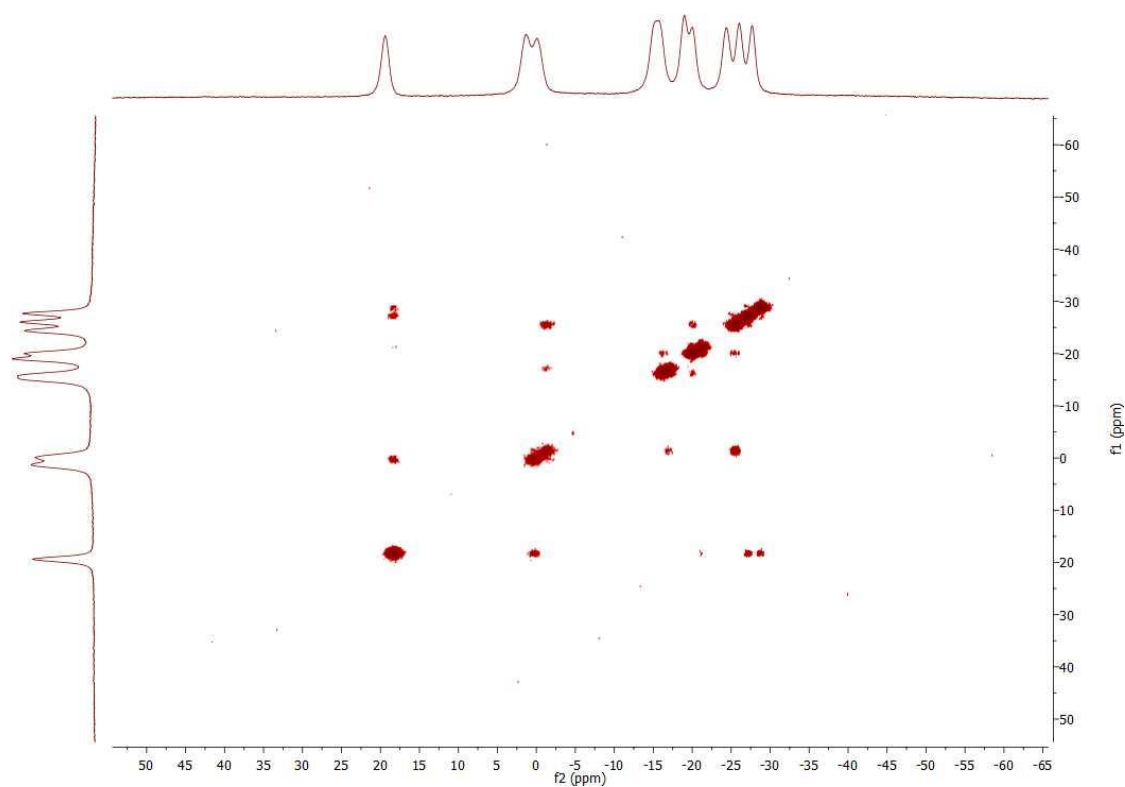

**Figure S5.**  $^{11}\text{B}$ - $^{11}\text{B}$  spectra of  $[\text{2.6-B}_{10}\text{H}_8\text{O}_2\text{CCH}_3^*\text{H}^{\text{fac}}]^-$ .

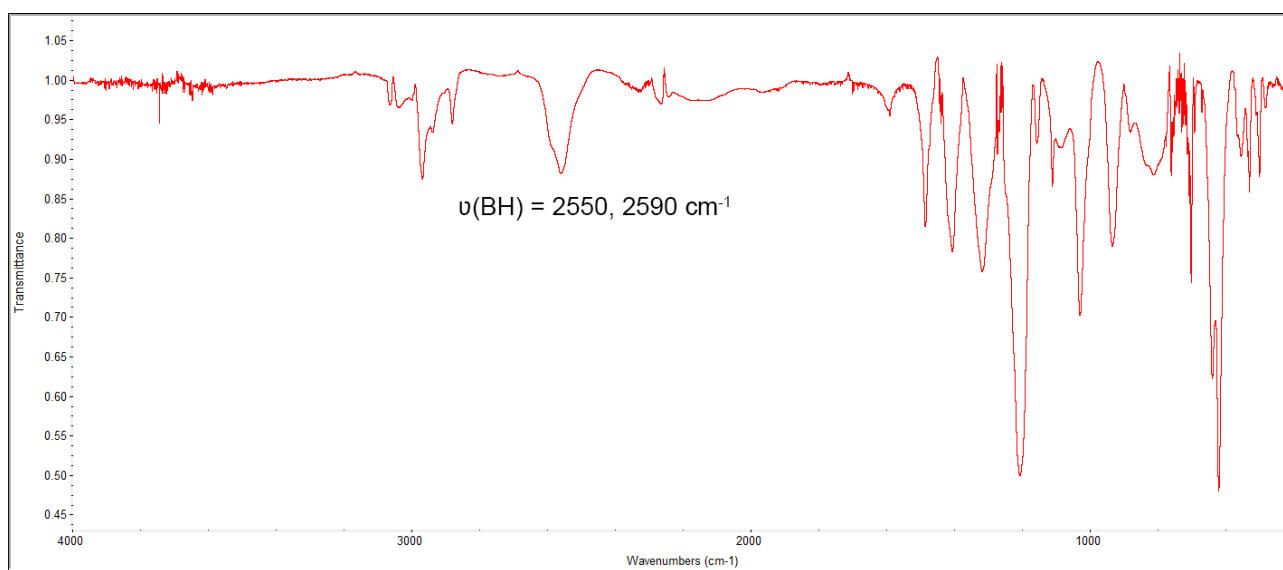

**Figure S6.** IR-spectra of  $[\text{2.6-B}_{10}\text{H}_8\text{O}_2\text{CCH}_3^*\text{H}^{\text{fac}}]^-$ .

**Table S1.** B–X bond lengths, Wiberg indices, and main topological parameters of electron density for B–F interactions.  $\rho(r)$  – electron density at the bcp,  $\nabla^2\rho(r)$  – Laplacian of electron density at the bcp,  $H_b$  – total energy at the bcp,  $\delta(\text{B–X})$  – delocalization index.

|                                                                                                  | B–X<br>length<br>(Å) | $\rho(r)$<br>(e Å <sup>-3</sup> ) | $\nabla^2\rho(r)$<br>(e Å <sup>-5</sup> ) | H <sub>b</sub> (h e <sup>-1</sup> ) | $\delta(\text{B–H})$ | Wiberg<br>index |
|--------------------------------------------------------------------------------------------------|----------------------|-----------------------------------|-------------------------------------------|-------------------------------------|----------------------|-----------------|
| [B <sub>10</sub> H <sub>8</sub> O <sub>2</sub> CCH <sub>3</sub> ] <sup>–</sup>                   |                      |                                   |                                           |                                     |                      |                 |
| B1-H                                                                                             | 1.196                | 0.166                             | -0.136                                    | -0.166                              | 0.721                | 0.95            |
| B3-H                                                                                             | 1.199                | 0.169                             | -0.177                                    | -0.172                              | 0.704                | 0.95            |
| B4-H                                                                                             | 1.200                | 0.168                             | -0.168                                    | -0.171                              | 0.701                | 0.95            |
| B5-H                                                                                             | 1.203                | 0.165                             | -0.147                                    | -0.166                              | 0.702                | 0.94            |
| B7-H                                                                                             | 1.203                | 0.165                             | -0.147                                    | -0.167                              | 0.701                | 0.94            |
| B8-H                                                                                             | 1.200                | 0.168                             | -0.167                                    | -0.171                              | 0.702                | 0.95            |
| B9-H                                                                                             | 1.199                | 0.169                             | -0.178                                    | -0.172                              | 0.704                | 0.95            |
| B10-H                                                                                            | 1.196                | 0.166                             | -0.136                                    | -0.166                              | 0.722                | 0.95            |
| B2-O                                                                                             | 1.539                | 0.121                             | 0.579                                     | -0.067                              | 0.495                | 0.61            |
| B6-O                                                                                             | 1.539                | 0.121                             | 0.578                                     | -0.067                              | 0.494                | 0.61            |
| [B <sub>10</sub> H <sub>8</sub> O <sub>2</sub> CCH <sub>3</sub> *H <sup>fac</sup> ] <sup>0</sup> |                      |                                   |                                           |                                     |                      |                 |
| B1-H <sup>fac</sup>                                                                              | 1.286                | 0.129                             | 0.101                                     | -0.116                              | 0.447                | 0.35            |
| B3-H <sup>fac</sup>                                                                              | 1.420                | 0.109                             | -0.081                                    | -0.083                              | 0.331                | 0.25            |
| B1-H                                                                                             | 1.186                | 0.177                             | -0.235                                    | -0.184                              | 0.702                | 0.90            |
| B3-H                                                                                             | 1.190                | 0.181                             | -0.286                                    | -0.193                              | 0.675                | 0.94            |
| B4-H                                                                                             | 1.188                | 0.181                             | -0.267                                    | -0.191                              | 0.698                | 0.95            |
| B5-H                                                                                             | 1.193                | 0.175                             | -0.215                                    | -0.181                              | 0.708                | 0.91            |
| B7-H                                                                                             | 1.193                | 0.174                             | -0.212                                    | -0.180                              | 0.711                | 0.93            |
| B8-H                                                                                             | 1.192                | 0.176                             | -0.223                                    | -0.183                              | 0.713                | 0.94            |
| B9-H                                                                                             | 1.190                | 0.177                             | -0.235                                    | -0.184                              | 0.718                | 0.93            |
| B10-H                                                                                            | 1.186                | 0.176                             | -0.215                                    | -0.181                              | 0.730                | 0.93            |
| B2-O                                                                                             | 1.502                | 0.138                             | 0.647                                     | -0.080                              | 0.512                | 0.63            |
| B6-O                                                                                             | 1.511                | 0.134                             | 0.626                                     | -0.076                              | 0.501                | 0.64            |
| [B <sub>10</sub> H <sub>11</sub> ] <sup>–</sup>                                                  |                      |                                   |                                           |                                     |                      |                 |
| B1-H <sup>fac</sup>                                                                              | 1.301                | 0.124                             | 0.133                                     | -0.109                              | 0.430                | 0.39            |
| B1-H                                                                                             | 1.192                | 0.172                             | -0.187                                    | -0.176                              | 0.690                | 0.94            |
| B2-H                                                                                             | 1.197                | 0.174                             | -0.223                                    | -0.181                              | 0.678                | 0.95            |
| B3-H                                                                                             | 1.197                | 0.174                             | -0.228                                    | -0.182                              | 0.681                | 0.95            |
| B4-H                                                                                             | 1.198                | 0.170                             | -0.184                                    | -0.174                              | 0.699                | 0.94            |
| B5-H                                                                                             | 1.198                | 0.170                             | -0.186                                    | -0.174                              | 0.702                | 0.94            |
| B6-H                                                                                             | 1.199                | 0.169                             | -0.184                                    | -0.173                              | 0.707                | 0.94            |
| B7-H                                                                                             | 1.201                | 0.169                             | -0.178                                    | -0.173                              | 0.708                | 0.95            |

|       |       |       |        |        |       |      |
|-------|-------|-------|--------|--------|-------|------|
| B8-H  | 1.199 | 0.169 | -0.180 | -0.173 | 0.706 | 0.94 |
| B9-H  | 1.199 | 0.169 | -0.184 | -0.173 | 0.704 | 0.95 |
| B10-H | 1.195 | 0.169 | -0.162 | -0.171 | 0.722 | 0.95 |

**Table S2.** NBO, QTAIM and Hirshfeld atomic charges of derivative [B<sub>10</sub>H<sub>8</sub>O<sub>2</sub>CCH<sub>3</sub>]<sup>-</sup> in a gas phase.

|     | Hirshfeld | NBO   | QTAIM |
|-----|-----------|-------|-------|
| 1O  | -0.09     | -0.57 | -1.31 |
| 2O  | -0.09     | -0.58 | -1.31 |
| 3C  | 0.29      | 0.92  | 1.63  |
| 4C  | -0.07     | -0.76 | 0.08  |
| 5H  | 0.08      | 0.29  | 0.07  |
| 6H  | 0.07      | 0.28  | 0.06  |
| 7H  | 0.07      | 0.28  | 0.06  |
| 8B  | -0.01     | -0.09 | 0.47  |
| 9H  | -0.03     | 0.07  | -0.58 |
| 10B | 0.07      | 0.34  | 0.31  |
| 11B | -0.01     | -0.17 | 0.66  |
| 12H | -0.04     | 0.09  | -0.59 |
| 13B | 0.01      | -0.09 | 0.67  |
| 14H | -0.03     | 0.08  | -0.60 |
| 15B | -0.05     | -0.25 | 0.62  |
| 16H | -0.04     | 0.09  | -0.59 |
| 17B | 0.07      | 0.34  | 0.30  |
| 18B | -0.05     | -0.25 | 0.62  |
| 19H | -0.04     | 0.09  | -0.59 |
| 20B | 0.01      | -0.09 | 0.67  |
| 21H | -0.03     | 0.08  | -0.60 |
| 22B | -0.01     | -0.17 | 0.66  |
| 23H | -0.04     | 0.09  | -0.59 |
| 24B | -0.01     | -0.09 | 0.47  |
| 25H | -0.03     | 0.07  | -0.58 |

**Table S3.** Fukui function values based on NBO, QTAIM, and Hirshfeld atomic charges of derivative [B<sub>10</sub>H<sub>8</sub>O<sub>2</sub>CCH<sub>3</sub>]<sup>-</sup> in a gas phase.

|    | Hirshfeld | NBO  | QTAIM |
|----|-----------|------|-------|
| 1O | 0.02      | 0.01 | 0.00  |
| 2O | 0.02      | 0.01 | 0.00  |

|     |      |       |       |
|-----|------|-------|-------|
| 3C  | 0.02 | 0.02  | -0.03 |
| 4C  | 0.01 | -0.01 | 0.01  |
| 5H  | 0.02 | 0.02  | 0.03  |
| 6H  | 0.02 | 0.02  | 0.03  |
| 7H  | 0.02 | 0.02  | 0.03  |
| 8B  | 0.10 | 0.17  | -0.10 |
| 9H  | 0.05 | 0.04  | 0.06  |
| 10B | 0.05 | 0.09  | 0.20  |
| 11B | 0.03 | -0.01 | 0.05  |
| 12H | 0.04 | 0.04  | 0.05  |
| 13B | 0.06 | 0.09  | 0.07  |
| 14H | 0.04 | 0.03  | 0.05  |
| 15B | 0.03 | -0.02 | 0.05  |
| 16H | 0.04 | 0.04  | 0.05  |
| 17B | 0.05 | 0.08  | 0.20  |
| 18B | 0.03 | -0.02 | 0.05  |
| 19H | 0.04 | 0.04  | 0.05  |
| 20B | 0.06 | 0.09  | 0.08  |
| 21H | 0.04 | 0.03  | 0.05  |
| 22B | 0.03 | -0.01 | 0.05  |
| 23H | 0.04 | 0.04  | 0.05  |
| 24B | 0.10 | 0.16  | -0.12 |
| 25H | 0.05 | 0.03  | 0.06  |

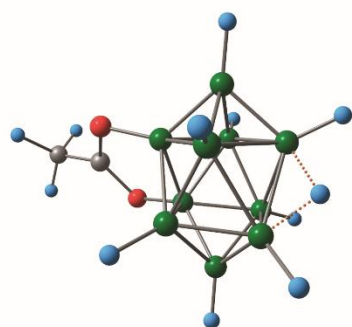

**Iso 3**

$$\Delta G_{\text{gp}} = 51.2$$

$$\Delta G_{\text{dcm}} = 50.5$$

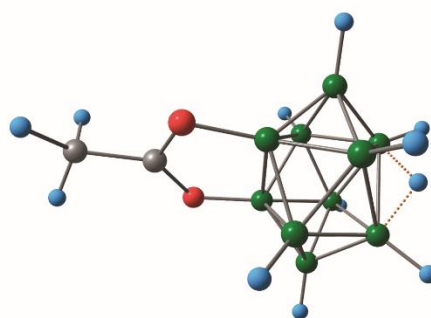

**Iso 4**

$$\Delta G_{\text{gp}} = 54.7$$

$$\Delta G_{\text{dcm}} = 54.3$$

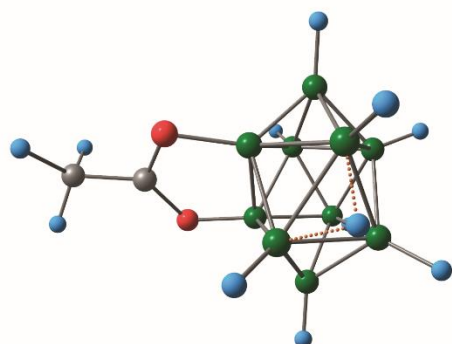

**Iso 5**

$$\Delta G_{\text{gp}} = 54.5$$

$$\Delta G_{\text{dcm}} = 54.4$$

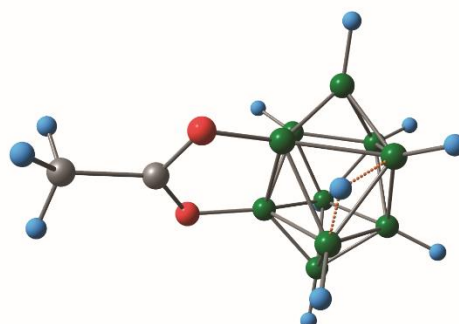

**Iso 6**

$$\Delta G_{\text{gp}} = 78.4$$

$$\Delta G_{\text{dcm}} = 71.9$$

**Figure S7.** Optimized structures for equatorial isomer of  $[\text{B}_{10}\text{H}_8\text{O}_2\text{CCH}_3^*\text{H}^{\text{fac}}]^0$ . Atomic designations were given in Figure 1 of the main text.

**Table S4.** Relative Gibbs energy of  $[\text{B}_{10}\text{H}_8\text{O}_2\text{CCH}_3^*\text{H}^{\text{fac}}]^0$  isomers.

|      | Gas phase | $\text{CH}_2\text{Cl}_2$ |
|------|-----------|--------------------------|
| Iso1 | 0.0       | 0.0                      |
| TS1  | 28.9      | 30.8                     |
| Iso2 | 21.7      | 22.3                     |
| TS2  | 80.1      | 80.3                     |
| Iso3 | 51.2      | 50.5                     |
| Iso4 | 54.7      | 54.3                     |
| Iso5 | 54.5      | 54.4                     |



|      |      |      |
|------|------|------|
| Iso6 | 78.4 | 71.9 |
|------|------|------|

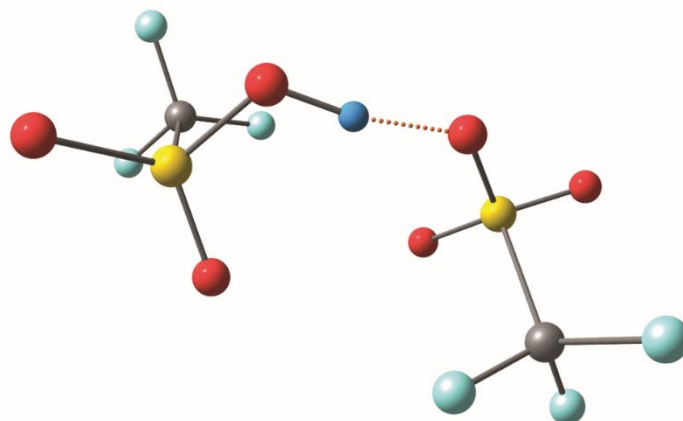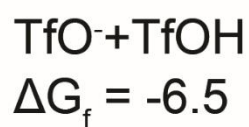

**Figure S8.** Optimized structures for supramolecular associates of CF<sub>3</sub>SO<sub>3</sub><sup>-</sup> with CF<sub>3</sub>SO<sub>3</sub>H. Atomic designations were given in Figure 1 of the main text.

**Table S5.** Predicted <sup>11</sup>B NMR chemical shifts (in ppm) for [B<sub>10</sub>H<sub>8</sub>O<sub>2</sub>CCH<sub>3</sub>]<sup>-</sup> and [B<sub>10</sub>H<sub>8</sub>O<sub>2</sub>CCH<sub>3</sub>\*H<sup>fac</sup>]<sup>0</sup>.  $\sigma_{\text{ref}}$  - absolute isotropic shielding for <sup>11</sup>B nuclei of BF<sub>3</sub>Et<sub>2</sub>O.  $\delta_{\text{theor}}$  – relative shifts of <sup>11</sup>B nuclei (in ppm). ( $\delta_{\text{theor}} = \sigma_{\text{ref}} - \sigma_{\text{abs}}$ ,  $\sigma_{\text{abs}}$  – absolute, isotropic shielding for the <sup>11</sup>B nuclei).  $\Delta = \delta_{\text{exp}} - \delta_{\text{theor}}$  (for values  $\delta_{\text{exp}}$  see Experimental Section).

**[B<sub>10</sub>H<sub>8</sub>O<sub>2</sub>CCH<sub>3</sub>]<sup>-</sup>**

| B97   |                         |          |                         |          |                         |          |
|-------|-------------------------|----------|-------------------------|----------|-------------------------|----------|
|       | IGLOIII                 |          | EPR-III                 |          | 6-31++G(d,p)            |          |
|       | $\sigma_{\text{ref}}$   | 99.66    | $\sigma_{\text{ref}}$   | 100.336  | $\sigma_{\text{ref}}$   | 110.85   |
|       | $\delta_{\text{theor}}$ | $\Delta$ | $\delta_{\text{theor}}$ | $\Delta$ | $\delta_{\text{theor}}$ | $\Delta$ |
| B1    | -11.8                   | 4.7      | -12.6                   | 5.5      | -11.5                   | 4.4      |
| B2    | -1.3                    | 1.3      | -2.3                    | 2.3      | -2.7                    | 2.7      |
| B3    | -22.3                   | 4.7      | -23.8                   | 6.2      | -22.3                   | 4.7      |
| B4    | -34.2                   | 4.2      | -34.7                   | 4.7      | -32.6                   | 2.6      |
| B5    | -33.5                   | 3.5      | -32.9                   | 2.9      | -33.1                   | 3.1      |
| B6    | -1.4                    | 1.4      | -1.5                    | 1.5      | -2.0                    | 2.0      |
| B7    | -33.7                   | 3.7      | -33.8                   | 3.8      | -31.0                   | 1.0      |
| B8    | -34.2                   | 4.2      | -34.2                   | 4.2      | -31.4                   | 1.4      |
| B9    | -21.6                   | 4.0      | -18.8                   | 1.2      | -19.5                   | 1.9      |
| B10   | -10.3                   | 3.2      | -11.2                   | 4.1      | -16.3                   | 9.2      |
|       | RMSD                    | 3.69     | RMSD                    | 3.97     | RMSD                    | 4.01     |
| B3LYP |                         |          |                         |          |                         |          |
|       | IGLOIII                 |          | EPR-III                 |          | 6-31++G(d,p)            |          |
|       | $\sigma_{\text{ref}}$   | 97.616   | $\sigma_{\text{ref}}$   | 97.909   | $\sigma_{\text{ref}}$   | 109.532  |

|          |                         |          |                         |          |                         |          |
|----------|-------------------------|----------|-------------------------|----------|-------------------------|----------|
|          | $\delta_{\text{theor}}$ | $\Delta$ | $\delta_{\text{theor}}$ | $\Delta$ | $\delta_{\text{theor}}$ | $\Delta$ |
| B1       | -11.6                   | 4.5      | -12.7                   | 5.6      | -11.6                   | 4.5      |
| B2       | -2.6                    | 2.6      | -3.9                    | 3.9      | -4.0                    | 4.0      |
| B3       | -22.7                   | 5.1      | -24.8                   | 7.2      | -23.0                   | 5.4      |
| B4       | -34.5                   | 4.5      | -35.3                   | 5.3      | -32.8                   | 2.8      |
| B5       | -34.3                   | 4.3      | -33.6                   | 3.6      | -33.7                   | 3.7      |
| B6       | -2.7                    | 2.7      | -3.0                    | 3.0      | -3.2                    | 3.2      |
| B7       | -34.7                   | 4.7      | -35.2                   | 5.2      | -31.9                   | 1.9      |
| B8       | -34.4                   | 4.4      | -34.5                   | 4.5      | -31.7                   | 1.7      |
| B9       | -21.9                   | 4.3      | -18.8                   | 1.2      | -20.7                   | 3.1      |
| B10      | -10.1                   | 3.0      | -11.2                   | 4.1      | -16.0                   | 8.9      |
|          | RMSD                    | 4.10     | RMSD                    | 4.64     | RMSD                    | 4.38     |
| wB97X-D3 |                         |          |                         |          |                         |          |
|          | IGLOIII                 |          | EPR-III                 |          | 6-31++G(d,p)            |          |
|          | $\sigma_{\text{ref}}$   | 120.286  | $\sigma_{\text{ref}}$   | 119.279  | $\sigma_{\text{ref}}$   | 129.015  |
|          | $\delta_{\text{theor}}$ | $\Delta$ | $\delta_{\text{theor}}$ | $\Delta$ | $\delta_{\text{theor}}$ | $\Delta$ |
| B1       | -93.4                   | 86.3     | -92.7                   | 85.6     | -67.0                   | 59.9     |
| B2       | -52.8                   | 52.8     | -58.5                   | 58.5     | -43.2                   | 43.2     |
| B3       | -101.9                  | 84.3     | -97.3                   | 79.7     | -104.8                  | 87.2     |
| B4       | -70.8                   | 40.8     | -75.9                   | 45.9     | -81.2                   | 51.2     |
| B5       | -39.1                   | 9.1      | -46.5                   | 16.5     | -67.9                   | 37.9     |
| B6       | 6.4                     | -6.4     | 5.3                     | -5.3     | -22.7                   | 22.7     |
| B7       | -68.2                   | 38.2     | -69.1                   | 39.1     | -56.8                   | 26.8     |
| B8       | -62.8                   | 32.8     | -61.5                   | 31.5     | -34.5                   | 4.5      |
| B9       | -3.7                    | -13.9    | -11.4                   | -6.2     | 1.0                     | -18.6    |
| B10      | 16.5                    | -23.6    | 10.9                    | -18.0    | -63.9                   | 56.8     |
|          | RMSD                    | 47.34    | RMSD                    | 47.31    | RMSD                    | 46.84    |

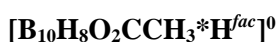

| B97   |                         |          |                         |          |                         |          |
|-------|-------------------------|----------|-------------------------|----------|-------------------------|----------|
|       | IGLOIII                 |          | EPR-III                 |          | 6-31++G(d,p)            |          |
|       | $\sigma_{\text{ref}}$   | 99.66    | $\sigma_{\text{ref}}$   | 100.336  | $\sigma_{\text{ref}}$   | 110.85   |
|       | $\delta_{\text{theor}}$ | $\Delta$ | $\delta_{\text{theor}}$ | $\Delta$ | $\delta_{\text{theor}}$ | $\Delta$ |
| B1    | 13,4                    | 5,8      | 13,0                    | 6,2      | 10,1                    | 9,1      |
| B2    | 0,3                     | 1,1      | 0,2                     | 1,2      | -0,9                    | 2,3      |
| B3    | -23,7                   | 3,6      | -24,2                   | 4,1      | -23,5                   | 3,4      |
| B4    | -32,4                   | 4,6      | -32,7                   | 4,9      | -30,9                   | 3,1      |
| B5    | -28,6                   | 4,2      | -28,7                   | 4,3      | -27,9                   | 3,5      |
| B6    | -2,5                    | 2,3      | -2,7                    | 2,5      | -3,3                    | 3,1      |
| B7    | -22,9                   | 3,8      | -23,0                   | 3,9      | -22,7                   | 3,6      |
| B8    | -16,5                   | 1,3      | -16,8                   | 1,6      | -16,7                   | 1,5      |
| B9    | -20,3                   | 4,6      | -20,1                   | 4,4      | -20,0                   | 4,3      |
| B10   | -27,3                   | 1,2      | -27,2                   | 1,1      | -26,6                   | 0,5      |
|       | RMSD                    | 3,61     | RMSD                    | 3,78     | RMSD                    | 4,06     |
| B3LYP |                         |          |                         |          |                         |          |

|          | IGLOIII                 |          | EPR-III                 |          | 6-31++G(d,p)            |          |
|----------|-------------------------|----------|-------------------------|----------|-------------------------|----------|
|          | $\sigma_{\text{ref}}$   | 97.616   | $\sigma_{\text{ref}}$   | 97.909   | $\sigma_{\text{ref}}$   | 109.532  |
|          | $\delta_{\text{theor}}$ | $\Delta$ | $\delta_{\text{theor}}$ | $\Delta$ | $\delta_{\text{theor}}$ | $\Delta$ |
| B1       | 14,5                    | 4,7      | 13,9                    | 5,3      | 10,8                    | 8,4      |
| B2       | 0,8                     | 0,6      | -0,3                    | 1,7      | -1,2                    | 2,6      |
| B3       | -24,7                   | 4,6      | -25,0                   | 4,9      | -24,2                   | 4,1      |
| B4       | -32,6                   | 4,8      | -33,1                   | 5,3      | -31,2                   | 3,4      |
| B5       | -28,9                   | 4,5      | -29,5                   | 5,1      | -28,4                   | 4,0      |
| B6       | -2,1                    | 1,9      | -3,0                    | 2,8      | -3,4                    | 3,2      |
| B7       | -22,9                   | 3,8      | -23,5                   | 4,4      | -22,9                   | 3,8      |
| B8       | -15,8                   | 0,6      | -16,9                   | 1,7      | -16,8                   | 1,6      |
| B9       | -20,6                   | 4,9      | -21,1                   | 5,4      | -20,8                   | 5,1      |
| B10      | -28,4                   | 2,3      | -28,5                   | 2,4      | -27,7                   | 1,6      |
|          | RMSD                    | 3,67     | RMSD                    | 4,17     | RMSD                    | 4,22     |
| wB97X-D3 |                         |          |                         |          |                         |          |
|          | IGLOIII                 |          | EPR-III                 |          | 6-31++G(d,p)            |          |
|          | $\sigma_{\text{ref}}$   | 120.286  | $\sigma_{\text{ref}}$   | 119.279  | $\sigma_{\text{ref}}$   | 129.015  |
|          | $\delta_{\text{theor}}$ | $\Delta$ | $\delta_{\text{theor}}$ | $\Delta$ | $\delta_{\text{theor}}$ | $\Delta$ |
| B1       | -82,1                   | 101,3    | -78,9                   | 98,1     | -62,0                   | 81,2     |
| B2       | -51,1                   | 52,5     | -59,6                   | 61,0     | -50,1                   | 51,5     |
| B3       | -99,5                   | 79,4     | -94,0                   | 73,9     | -102,4                  | 82,3     |
| B4       | -74,3                   | 46,5     | -78,8                   | 51,0     | -71,8                   | 44,0     |
| B5       | -32,2                   | 7,8      | -39,3                   | 14,9     | -60,6                   | 36,2     |
| B6       | 13,5                    | -13,7    | 19,4                    | -19,6    | 10,5                    | -10,7    |
| B7       | -55,2                   | 36,1     | -60,7                   | 41,6     | -61,2                   | 42,1     |
| B8       | -35,4                   | 20,2     | -38,3                   | 23,1     | -40,1                   | 24,9     |
| B9       | -0,1                    | -15,6    | 3,7                     | -19,4    | 30,5                    | -46,2    |
| B10      | 2,9                     | -29,0    | 6,9                     | -33,0    | 2,6                     | -28,7    |
|          | RMSD                    | 49,54    | RMSD                    | 50,75    | RMSD                    | 49,71    |

**Table S6.** Predicted  $^1\text{H}$  NMR chemical shifts (in ppm) of  $[\text{B}_{10}\text{H}_8\text{O}_2\text{CCH}_3]^-$  and  $[\text{B}_{10}\text{H}_8\text{O}_2\text{CCH}_3^*\text{H}^{\text{fac}}]^0$ .  $\sigma_{\text{ref}}$  - absolute isotropic shielding for  $^1\text{H}$  nuclei of  $\text{Si}(\text{CH}_3)_4$ .  $\delta_{\text{theor}}$  – relative shifts of  $^1\text{H}$  nuclei (in ppm). ( $\delta_{\text{theor}} = \sigma_{\text{ref}} - \sigma_{\text{abs}}$ ,  $\sigma_{\text{abs}}$  – absolute, isotropic shielding for the  $^1\text{H}$  nuclei).  $\Delta = \delta_{\text{exp}} - \delta_{\text{theor}}$  (for values  $\delta_{\text{exp}}$  see Experimental Section).

| $[\text{B}_{10}\text{H}_8\text{O}_2\text{CCH}_3]^-$ |                         |          |
|-----------------------------------------------------|-------------------------|----------|
|                                                     | $\sigma_{\text{ref}}$   | 31.645   |
|                                                     | $\delta_{\text{theor}}$ | $\Delta$ |
| Hsub                                                | 2.22                    | -0.04    |
| Hsub                                                | 2.03                    | 0.15     |
| Hsub                                                | 2.06                    | 0.12     |
| H-B1                                                | 3.22                    | -0.05    |
| H-B3                                                | 1.85                    | -0.06    |
| H-B4                                                | 0.14                    | -0.01    |
| H-B5                                                | 0.58                    | -0.18    |

|                                                                                              |                         |          |
|----------------------------------------------------------------------------------------------|-------------------------|----------|
| H-B7                                                                                         | 0.52                    | -0.12    |
| H-B8                                                                                         | 0.10                    | 0.03     |
| H-B9                                                                                         | 1.84                    | -0.07    |
| H-B10                                                                                        | 3.32                    | -0.15    |
|                                                                                              | RMSD                    | 0.10     |
| <b>[B<sub>10</sub>H<sub>8</sub>O<sub>2</sub>CCH<sub>3</sub>*H<sup>fac</sup>]<sup>0</sup></b> |                         |          |
|                                                                                              | $\sigma_{\text{ref}}$   | 31.645   |
|                                                                                              | $\delta_{\text{theor}}$ | $\Delta$ |
| Hsub                                                                                         | 2.56                    | -0.05    |
| Hsub                                                                                         | 2.33                    | 0.17     |
| Hsub                                                                                         | 2.41                    | 0.09     |
| H-B10                                                                                        | 5.05                    | 0.12     |
| H-B9                                                                                         | 2.01                    | 0.02     |
| H-B8                                                                                         | 0.31                    | 0.31     |
| H-B7                                                                                         | 1.32                    | -0.39    |
| H-B5                                                                                         | 1.71                    | -0.39    |
| H-B4                                                                                         | 1.97                    | -0.37    |
| H-B3                                                                                         | 2.82                    | -0.14    |
| Hfac                                                                                         | 0.00                    | 0.36     |
| H-B10                                                                                        | 3.57                    | -        |
|                                                                                              | RMSD                    | 0.25     |

**Table S7.** Cartesian atomic coordinates of the calculated optimized equilibrium model structures. All coordinates are given in Angstrom units.

**Optimized equilibrium model structures in gas phase**

| Compound                                                                       | Atom | x        | y        | z         |
|--------------------------------------------------------------------------------|------|----------|----------|-----------|
| [B <sub>10</sub> H <sub>8</sub> O <sub>2</sub> CCH <sub>3</sub> ] <sup>-</sup> |      |          |          |           |
|                                                                                | O    | 7.323323 | 6.693397 | 11.200566 |
|                                                                                | O    | 6.598392 | 5.106300 | 9.817883  |
|                                                                                | C    | 7.348760 | 5.493732 | 10.772084 |
|                                                                                | C    | 8.259573 | 4.508696 | 11.425461 |
|                                                                                | H    | 7.712111 | 4.016671 | 12.235250 |
|                                                                                | H    | 9.121702 | 5.023039 | 11.850208 |
|                                                                                | H    | 8.569701 | 3.751522 | 10.705035 |

|                                                                                                           |   |          |           |           |
|-----------------------------------------------------------------------------------------------------------|---|----------|-----------|-----------|
|                                                                                                           | B | 5.591706 | 6.839463  | 7.720140  |
|                                                                                                           | H | 5.803420 | 6.337506  | 6.655799  |
|                                                                                                           | B | 5.772992 | 6.289956  | 9.282864  |
|                                                                                                           | B | 4.167753 | 6.872505  | 8.689193  |
|                                                                                                           | H | 3.170978 | 6.319861  | 8.317004  |
|                                                                                                           | B | 5.031763 | 8.398381  | 8.141709  |
|                                                                                                           | H | 4.775885 | 9.174678  | 7.262820  |
|                                                                                                           | B | 6.618203 | 7.775719  | 8.722910  |
|                                                                                                           | H | 7.777071 | 7.947841  | 8.449933  |
|                                                                                                           | B | 6.232026 | 7.490820  | 10.464614 |
|                                                                                                           | B | 4.542717 | 6.879980  | 10.467007 |
|                                                                                                           | H | 4.025107 | 6.048157  | 11.165767 |
|                                                                                                           | B | 4.037969 | 8.414123  | 9.671747  |
|                                                                                                           | H | 2.983728 | 8.986760  | 9.686216  |
|                                                                                                           | B | 5.760686 | 9.054905  | 9.689166  |
|                                                                                                           | H | 6.221037 | 10.161733 | 9.707012  |
|                                                                                                           | B | 4.992133 | 8.412361  | 11.089445 |
|                                                                                                           | H | 4.804336 | 8.888334  | 12.170177 |
| [B <sub>10</sub> H <sub>8</sub> O <sub>2</sub> CCH <sub>3</sub> *H <sup>fac</sup> ] <sup>0</sup><br>Iso 1 |   |          |           |           |
|                                                                                                           | O | 7.284772 | 6.732598  | 11.191875 |
|                                                                                                           | O | 6.586260 | 5.131385  | 9.819067  |
|                                                                                                           | C | 7.328701 | 5.516856  | 10.784968 |
|                                                                                                           | C | 8.225695 | 4.546998  | 11.460542 |
|                                                                                                           | H | 7.648080 | 4.027423  | 12.231758 |
|                                                                                                           | H | 9.054371 | 5.070063  | 11.936175 |
|                                                                                                           | H | 8.583104 | 3.808489  | 10.742982 |
|                                                                                                           | B | 5.579422 | 6.852642  | 7.688898  |
|                                                                                                           | H | 5.782914 | 6.406740  | 6.608848  |
|                                                                                                           | B | 5.784455 | 6.284251  | 9.261979  |

|                                                                                                         |   |          |           |           |
|---------------------------------------------------------------------------------------------------------|---|----------|-----------|-----------|
|                                                                                                         | B | 4.176260 | 6.811623  | 8.656978  |
|                                                                                                         | H | 3.179824 | 6.278657  | 8.283957  |
|                                                                                                         | B | 4.985632 | 8.398051  | 8.154607  |
|                                                                                                         | H | 4.728563 | 9.170187  | 7.284128  |
|                                                                                                         | B | 6.615330 | 7.744265  | 8.691029  |
|                                                                                                         | H | 7.747883 | 7.983327  | 8.402589  |
|                                                                                                         | B | 6.252766 | 7.502641  | 10.418605 |
|                                                                                                         | B | 4.530412 | 6.885824  | 10.419424 |
|                                                                                                         | H | 4.059218 | 6.113114  | 11.196303 |
|                                                                                                         | B | 3.931961 | 8.327613  | 9.626274  |
|                                                                                                         | H | 2.911816 | 8.936837  | 9.651260  |
|                                                                                                         | B | 5.844747 | 9.067237  | 9.669554  |
|                                                                                                         | H | 6.320571 | 10.155043 | 9.589101  |
|                                                                                                         | B | 4.994329 | 8.385546  | 11.119999 |
|                                                                                                         | H | 4.849173 | 8.681641  | 12.259320 |
|                                                                                                         | H | 4.768137 | 9.486214  | 10.495545 |
| [B <sub>10</sub> H <sub>8</sub> O <sub>2</sub> CCH <sub>3</sub> *H <sup>fac</sup> ] <sup>0</sup><br>TS1 |   |          |           |           |
|                                                                                                         | O | 7.218384 | 6.666966  | 11.259451 |
|                                                                                                         | O | 6.620197 | 5.105223  | 9.799643  |
|                                                                                                         | C | 7.327277 | 5.470927  | 10.794145 |
|                                                                                                         | C | 8.283495 | 4.531996  | 11.429450 |
|                                                                                                         | H | 8.060720 | 4.461664  | 12.496755 |
|                                                                                                         | H | 9.294655 | 4.934732  | 11.325244 |
|                                                                                                         | H | 8.218164 | 3.552676  | 10.959318 |
|                                                                                                         | B | 5.671044 | 6.840215  | 7.710491  |
|                                                                                                         | H | 5.989640 | 6.383766  | 6.662793  |
|                                                                                                         | B | 5.789048 | 6.254486  | 9.261403  |
|                                                                                                         | B | 4.191603 | 6.823726  | 8.614164  |
|                                                                                                         | H | 3.217957 | 6.250855  | 8.241046  |

|                                                                                                           |   |          |           |           |
|-----------------------------------------------------------------------------------------------------------|---|----------|-----------|-----------|
|                                                                                                           | B | 4.994448 | 8.347980  | 8.077569  |
|                                                                                                           | H | 4.800503 | 9.131901  | 7.202486  |
|                                                                                                           | B | 6.613203 | 7.786937  | 8.801692  |
|                                                                                                           | H | 7.762677 | 7.994128  | 8.550548  |
|                                                                                                           | B | 6.187421 | 7.411348  | 10.488681 |
|                                                                                                           | B | 4.537254 | 6.846935  | 10.400844 |
|                                                                                                           | H | 3.988880 | 6.089773  | 11.140813 |
|                                                                                                           | B | 3.973603 | 8.359453  | 9.558079  |
|                                                                                                           | H | 2.902589 | 8.877404  | 9.572527  |
|                                                                                                           | B | 5.626334 | 9.119716  | 9.615647  |
|                                                                                                           | H | 6.106447 | 10.206385 | 9.513607  |
|                                                                                                           | B | 4.832519 | 8.409592  | 11.063825 |
|                                                                                                           | H | 4.425073 | 8.753147  | 12.124258 |
|                                                                                                           | H | 5.911568 | 9.099249  | 10.994838 |
| [B <sub>10</sub> H <sub>8</sub> O <sub>2</sub> CCH <sub>3</sub> *H <sup>fac</sup> ] <sup>0</sup><br>Iso 2 |   |          |           |           |
|                                                                                                           | O | 7.301352 | 6.666872  | 11.219967 |
|                                                                                                           | O | 6.572013 | 5.117904  | 9.814224  |
|                                                                                                           | C | 7.344135 | 5.464799  | 10.763645 |
|                                                                                                           | C | 8.276641 | 4.485192  | 11.371679 |
|                                                                                                           | H | 7.760220 | 3.992366  | 12.201668 |
|                                                                                                           | H | 9.154185 | 4.997851  | 11.764723 |
|                                                                                                           | H | 8.554767 | 3.730173  | 10.637108 |
|                                                                                                           | B | 5.631230 | 6.820632  | 7.744730  |
|                                                                                                           | H | 5.915979 | 6.284582  | 6.725048  |
|                                                                                                           | B | 5.753274 | 6.279295  | 9.308067  |
|                                                                                                           | B | 4.182671 | 6.846745  | 8.703456  |
|                                                                                                           | H | 3.182628 | 6.289454  | 8.379999  |
|                                                                                                           | B | 5.016634 | 8.359955  | 8.069975  |
|                                                                                                           | H | 4.790403 | 9.106468  | 7.169165  |

|                                                                                                         |   |          |           |           |
|---------------------------------------------------------------------------------------------------------|---|----------|-----------|-----------|
|                                                                                                         | B | 6.607828 | 7.820839  | 8.757939  |
|                                                                                                         | H | 7.758174 | 7.982513  | 8.477939  |
|                                                                                                         | B | 6.246372 | 7.470222  | 10.530573 |
|                                                                                                         | B | 4.556769 | 6.896773  | 10.468700 |
|                                                                                                         | H | 4.001272 | 6.128614  | 11.193123 |
|                                                                                                         | B | 4.060102 | 8.430243  | 9.613162  |
|                                                                                                         | H | 3.016292 | 8.990742  | 9.725800  |
|                                                                                                         | B | 5.663212 | 9.159769  | 9.513089  |
|                                                                                                         | H | 6.145602 | 10.241936 | 9.596050  |
|                                                                                                         | B | 4.931829 | 8.461862  | 11.105751 |
|                                                                                                         | H | 4.531767 | 8.944625  | 12.111752 |
|                                                                                                         | H | 6.210890 | 8.637974  | 11.230881 |
| [B <sub>10</sub> H <sub>8</sub> O <sub>2</sub> CCH <sub>3</sub> *H <sup>fac</sup> ] <sup>0</sup><br>TS2 |   |          |           |           |
|                                                                                                         | O | 7.276852 | 6.737342  | 11.195293 |
|                                                                                                         | O | 6.573586 | 5.144937  | 9.812980  |
|                                                                                                         | C | 7.329189 | 5.527875  | 10.769402 |
|                                                                                                         | C | 8.254258 | 4.562466  | 11.412150 |
|                                                                                                         | H | 7.702818 | 4.030462  | 12.194010 |
|                                                                                                         | H | 9.088615 | 5.091169  | 11.871454 |
|                                                                                                         | H | 8.601076 | 3.834437  | 10.678957 |
|                                                                                                         | B | 5.580888 | 6.826580  | 7.707907  |
|                                                                                                         | H | 5.807602 | 6.313185  | 6.662927  |
|                                                                                                         | B | 5.756592 | 6.297897  | 9.275620  |
|                                                                                                         | B | 4.149488 | 6.888493  | 8.654327  |
|                                                                                                         | H | 3.153293 | 6.343183  | 8.300547  |
|                                                                                                         | B | 5.022391 | 8.389743  | 8.060247  |
|                                                                                                         | H | 4.751938 | 9.211532  | 7.245522  |
|                                                                                                         | B | 6.588323 | 7.794447  | 8.701837  |
|                                                                                                         | H | 7.740467 | 7.973081  | 8.445752  |



|                                                                                                           |   |          |           |           |
|-----------------------------------------------------------------------------------------------------------|---|----------|-----------|-----------|
|                                                                                                           | B | 6.195879 | 7.488702  | 10.476489 |
|                                                                                                           | B | 4.532773 | 6.897775  | 10.464116 |
|                                                                                                           | H | 3.941923 | 6.117289  | 11.143266 |
|                                                                                                           | B | 3.885562 | 8.334217  | 9.682487  |
|                                                                                                           | H | 2.843523 | 8.907607  | 9.694295  |
|                                                                                                           | B | 5.914674 | 9.063790  | 9.719987  |
|                                                                                                           | H | 6.369560 | 10.162510 | 9.736379  |
|                                                                                                           | B | 4.956208 | 8.401449  | 11.117560 |
|                                                                                                           | H | 4.750750 | 8.921910  | 12.161552 |
|                                                                                                           | H | 4.640641 | 9.407214  | 9.436447  |
| [B <sub>10</sub> H <sub>8</sub> O <sub>2</sub> CCH <sub>3</sub> *H <sup>fac</sup> ] <sup>0</sup><br>Iso 3 |   |          |           |           |
|                                                                                                           | O | 7.283442 | 6.648884  | 11.205067 |
|                                                                                                           | O | 6.599333 | 5.083567  | 9.791195  |
|                                                                                                           | C | 7.339715 | 5.447051  | 10.769677 |
|                                                                                                           | C | 8.242844 | 4.464924  | 11.418149 |
|                                                                                                           | H | 7.673768 | 3.936276  | 12.189634 |
|                                                                                                           | H | 9.077837 | 4.979683  | 11.891917 |
|                                                                                                           | H | 8.590143 | 3.736345  | 10.685824 |
|                                                                                                           | B | 5.546383 | 6.758267  | 7.714917  |
|                                                                                                           | H | 5.791632 | 6.320040  | 6.640555  |
|                                                                                                           | B | 5.779574 | 6.238100  | 9.286171  |
|                                                                                                           | B | 4.163046 | 6.715559  | 8.676750  |
|                                                                                                           | H | 3.137217 | 6.225338  | 8.328528  |
|                                                                                                           | B | 5.043928 | 8.350622  | 8.064978  |
|                                                                                                           | H | 4.912647 | 9.016288  | 7.080095  |
|                                                                                                           | B | 6.587678 | 7.745370  | 8.724846  |
|                                                                                                           | H | 7.713032 | 7.944227  | 8.382112  |
|                                                                                                           | B | 6.238992 | 7.435382  | 10.462118 |
|                                                                                                           | B | 4.533805 | 6.860977  | 10.424448 |

|                                                                             |   |          |           |           |
|-----------------------------------------------------------------------------|---|----------|-----------|-----------|
|                                                                             | H | 3.954461 | 6.095370  | 11.133565 |
|                                                                             | B | 4.007449 | 8.407585  | 9.704325  |
|                                                                             | H | 2.966849 | 8.960689  | 9.907410  |
|                                                                             | B | 5.860929 | 9.032366  | 9.740340  |
|                                                                             | H | 6.295415 | 10.138191 | 9.695488  |
|                                                                             | B | 5.030016 | 8.416089  | 11.070562 |
|                                                                             | H | 4.773356 | 8.866537  | 12.137210 |
|                                                                             | H | 3.969858 | 8.958673  | 8.512888  |
| $[\text{B}_{10}\text{H}_8\text{O}_2\text{CCH}_3*\text{H}^{fac}]^0$<br>Iso 4 |   |          |           |           |
|                                                                             | O | 7.299103 | 6.656462  | 11.195861 |
|                                                                             | O | 6.558459 | 5.086890  | 9.811360  |
|                                                                             | C | 7.329801 | 5.450337  | 10.764894 |
|                                                                             | C | 8.242145 | 4.463987  | 11.393827 |
|                                                                             | H | 7.682877 | 3.926778  | 12.166536 |
|                                                                             | H | 9.081935 | 4.975996  | 11.861868 |
|                                                                             | H | 8.581536 | 3.742446  | 10.650755 |
|                                                                             | B | 5.592349 | 6.779041  | 7.729735  |
|                                                                             | H | 5.794686 | 6.310973  | 6.659750  |
|                                                                             | B | 5.763084 | 6.260228  | 9.301620  |
|                                                                             | B | 4.164975 | 6.848755  | 8.677134  |
|                                                                             | H | 3.165207 | 6.319580  | 8.310775  |
|                                                                             | B | 5.094848 | 8.364811  | 8.031565  |
|                                                                             | H | 4.915617 | 9.067314  | 7.085297  |
|                                                                             | B | 6.633671 | 7.733571  | 8.725216  |
|                                                                             | H | 7.784982 | 7.884427  | 8.450253  |
|                                                                             | B | 6.237612 | 7.446150  | 10.478475 |
|                                                                             | B | 4.545877 | 6.889078  | 10.455658 |
|                                                                             | H | 3.941266 | 6.108478  | 11.124614 |
|                                                                             | B | 3.985020 | 8.399650  | 9.728795  |

|                                                                                                           |   |          |           |           |
|-----------------------------------------------------------------------------------------------------------|---|----------|-----------|-----------|
|                                                                                                           | H | 2.957648 | 8.997760  | 9.749114  |
|                                                                                                           | B | 5.890922 | 9.047137  | 9.742547  |
|                                                                                                           | H | 6.324386 | 10.152961 | 9.728578  |
|                                                                                                           | B | 5.026723 | 8.418228  | 11.093397 |
|                                                                                                           | H | 4.833839 | 8.899786  | 12.160544 |
|                                                                                                           | H | 4.637050 | 9.281995  | 8.847434  |
| [B <sub>10</sub> H <sub>8</sub> O <sub>2</sub> CCH <sub>3</sub> *H <sup>fac</sup> ] <sup>0</sup><br>Iso 5 |   |          |           |           |
|                                                                                                           | O | 7.312634 | 6.668383  | 11.184311 |
|                                                                                                           | O | 6.585178 | 5.093544  | 9.799673  |
|                                                                                                           | C | 7.341547 | 5.460108  | 10.765418 |
|                                                                                                           | C | 8.237273 | 4.471995  | 11.415015 |
|                                                                                                           | H | 7.662936 | 3.948414  | 12.186068 |
|                                                                                                           | H | 9.075843 | 4.980886  | 11.888677 |
|                                                                                                           | H | 8.578982 | 3.739568  | 10.683823 |
|                                                                                                           | B | 5.575323 | 6.769347  | 7.701568  |
|                                                                                                           | H | 5.791034 | 6.262813  | 6.650538  |
|                                                                                                           | B | 5.758477 | 6.242934  | 9.282800  |
|                                                                                                           | B | 4.164336 | 6.828858  | 8.696882  |
|                                                                                                           | H | 3.144407 | 6.342091  | 8.326466  |
|                                                                                                           | B | 4.954420 | 8.328560  | 8.048640  |
|                                                                                                           | H | 4.743027 | 9.110270  | 7.177668  |
|                                                                                                           | B | 6.675861 | 7.652794  | 8.681724  |
|                                                                                                           | H | 7.819025 | 7.807296  | 8.385819  |
|                                                                                                           | B | 6.248181 | 7.454789  | 10.462107 |
|                                                                                                           | B | 4.543819 | 6.855600  | 10.446575 |
|                                                                                                           | H | 4.017611 | 6.048931  | 11.151581 |
|                                                                                                           | B | 4.054465 | 8.400388  | 9.647792  |
|                                                                                                           | H | 3.018066 | 8.985356  | 9.653788  |
|                                                                                                           | B | 5.791300 | 9.064785  | 9.756195  |

|                                                                                                           |   |          |           |           |
|-----------------------------------------------------------------------------------------------------------|---|----------|-----------|-----------|
|                                                                                                           | H | 6.215566 | 10.172686 | 9.859565  |
|                                                                                                           | B | 4.982843 | 8.360212  | 11.086913 |
|                                                                                                           | H | 4.827772 | 8.897277  | 12.132320 |
|                                                                                                           | H | 6.214865 | 8.981929  | 8.488083  |
| [B <sub>10</sub> H <sub>8</sub> O <sub>2</sub> CCH <sub>3</sub> *H <sup>fac</sup> ] <sup>0</sup><br>Iso 6 |   |          |           |           |
|                                                                                                           | O | 7.299517 | 6.606410  | 11.250140 |
|                                                                                                           | O | 6.596114 | 5.066921  | 9.810701  |
|                                                                                                           | C | 7.336221 | 5.401159  | 10.790067 |
|                                                                                                           | C | 8.228232 | 4.407231  | 11.433273 |
|                                                                                                           | H | 7.668965 | 3.924614  | 12.241411 |
|                                                                                                           | H | 9.095899 | 4.905569  | 11.864680 |
|                                                                                                           | H | 8.522737 | 3.646108  | 10.711526 |
|                                                                                                           | B | 5.562060 | 6.762091  | 7.710801  |
|                                                                                                           | H | 5.837554 | 6.257155  | 6.674274  |
|                                                                                                           | B | 5.799492 | 6.251696  | 9.295924  |
|                                                                                                           | B | 4.182095 | 6.821041  | 8.709401  |
|                                                                                                           | H | 3.207102 | 6.247349  | 8.340843  |
|                                                                                                           | B | 5.041888 | 8.339294  | 8.102945  |
|                                                                                                           | H | 4.793380 | 9.100314  | 7.221779  |
|                                                                                                           | B | 6.666247 | 7.700889  | 8.626061  |
|                                                                                                           | H | 7.782549 | 7.774346  | 8.206733  |
|                                                                                                           | B | 6.251067 | 7.399812  | 10.557362 |
|                                                                                                           | B | 4.546522 | 6.859382  | 10.460009 |
|                                                                                                           | H | 4.067564 | 6.025833  | 11.168442 |
|                                                                                                           | B | 4.059130 | 8.363766  | 9.649760  |
|                                                                                                           | H | 3.046383 | 8.988623  | 9.619316  |
|                                                                                                           | B | 5.706651 | 9.107171  | 9.640299  |
|                                                                                                           | H | 6.163935 | 10.204131 | 9.669880  |
|                                                                                                           | B | 5.014024 | 8.392542  | 11.078161 |

|  |   |          |          |           |
|--|---|----------|----------|-----------|
|  | H | 4.815737 | 8.902846 | 12.131683 |
|  | H | 6.986742 | 8.431301 | 9.671096  |

### Optimized equilibrium model structures in dichloromethane

| Compound                                                                       | Atom | x        | y        | z         |
|--------------------------------------------------------------------------------|------|----------|----------|-----------|
| [B <sub>10</sub> H <sub>8</sub> O <sub>2</sub> CCH <sub>3</sub> ] <sup>−</sup> |      |          |          |           |
|                                                                                | O    | 7.313763 | 6.697223 | 11.197642 |
|                                                                                | O    | 6.597125 | 5.116389 | 9.813154  |
|                                                                                | C    | 7.357112 | 5.487351 | 10.776697 |
|                                                                                | C    | 8.260600 | 4.510506 | 11.422915 |
|                                                                                | H    | 7.694735 | 4.002183 | 12.211181 |
|                                                                                | H    | 9.109086 | 5.022453 | 11.876033 |
|                                                                                | H    | 8.592877 | 3.766594 | 10.698776 |
|                                                                                | B    | 5.591203 | 6.837329 | 7.726907  |
|                                                                                | H    | 5.797277 | 6.339362 | 6.660329  |
|                                                                                | B    | 5.783547 | 6.280814 | 9.290338  |
|                                                                                | B    | 4.172721 | 6.869713 | 8.695957  |
|                                                                                | H    | 3.172546 | 6.324035 | 8.321836  |
|                                                                                | B    | 5.030368 | 8.394869 | 8.145063  |
|                                                                                | H    | 4.768789 | 9.170680 | 7.266376  |
|                                                                                | B    | 6.615380 | 7.773679 | 8.723033  |
|                                                                                | H    | 7.767606 | 7.958022 | 8.439991  |
|                                                                                | B    | 6.241220 | 7.480509 | 10.470859 |
|                                                                                | B    | 4.544965 | 6.882771 | 10.467419 |
|                                                                                | H    | 4.014725 | 6.059661 | 11.162834 |
|                                                                                | B    | 4.042257 | 8.413704 | 9.670827  |
|                                                                                | H    | 2.989322 | 8.990353 | 9.681598  |
|                                                                                | B    | 5.764422 | 9.048211 | 9.688952  |

|                                                                                                           |   |          |           |           |
|-----------------------------------------------------------------------------------------------------------|---|----------|-----------|-----------|
|                                                                                                           | H | 6.218719 | 10.157908 | 9.702272  |
|                                                                                                           | B | 4.996849 | 8.410176  | 11.086083 |
|                                                                                                           | H | 4.805858 | 8.891947  | 12.162936 |
| [B <sub>10</sub> H <sub>8</sub> O <sub>2</sub> CCH <sub>3</sub> *H <sup>fac</sup> ] <sup>0</sup><br>Iso 1 |   |          |           |           |
|                                                                                                           | O | 7.284547 | 6.733686  | 11.186792 |
|                                                                                                           | O | 6.590200 | 5.135557  | 9.812347  |
|                                                                                                           | C | 7.337641 | 5.512141  | 10.785960 |
|                                                                                                           | C | 8.223605 | 4.546098  | 11.460551 |
|                                                                                                           | H | 7.629616 | 4.032933  | 12.225274 |
|                                                                                                           | H | 9.050860 | 5.063708  | 11.944464 |
|                                                                                                           | H | 8.583725 | 3.805145  | 10.746737 |
|                                                                                                           | B | 5.580674 | 6.851546  | 7.693494  |
|                                                                                                           | H | 5.780072 | 6.408715  | 6.608948  |
|                                                                                                           | B | 5.793425 | 6.278504  | 9.265157  |
|                                                                                                           | B | 4.180012 | 6.810260  | 8.661243  |
|                                                                                                           | H | 3.181605 | 6.278184  | 8.285901  |
|                                                                                                           | B | 4.983856 | 8.395907  | 8.156641  |
|                                                                                                           | H | 4.720977 | 9.166773  | 7.283355  |
|                                                                                                           | B | 6.613769 | 7.747234  | 8.689745  |
|                                                                                                           | H | 7.742998 | 7.994195  | 8.394783  |
|                                                                                                           | B | 6.258420 | 7.497459  | 10.420621 |
|                                                                                                           | B | 4.535805 | 6.885243  | 10.419536 |
|                                                                                                           | H | 4.060679 | 6.112364  | 11.193291 |
|                                                                                                           | B | 3.936764 | 8.330049  | 9.629414  |
|                                                                                                           | H | 2.912980 | 8.933723  | 9.653239  |
|                                                                                                           | B | 5.843410 | 9.066371  | 9.672658  |
|                                                                                                           | H | 6.314414 | 10.155910 | 9.592647  |
|                                                                                                           | B | 4.997602 | 8.385534  | 11.116568 |
|                                                                                                           | H | 4.848999 | 8.687134  | 12.253433 |

|                                                                              |   |          |           |           |
|------------------------------------------------------------------------------|---|----------|-----------|-----------|
|                                                                              | H | 4.767740 | 9.490889  | 10.492966 |
| $[\text{B}_{10}\text{H}_8\text{O}_2\text{CCH}_3^*\text{H}^{fac}]^0$<br>TS1   |   |          |           |           |
|                                                                              | O | 7.218734 | 6.664433  | 11.253439 |
|                                                                              | O | 6.625316 | 5.107468  | 9.789743  |
|                                                                              | C | 7.334059 | 5.462085  | 10.795782 |
|                                                                              | C | 8.274609 | 4.525732  | 11.435150 |
|                                                                              | H | 8.045856 | 4.469743  | 12.502567 |
|                                                                              | H | 9.287346 | 4.925647  | 11.327770 |
|                                                                              | H | 8.206300 | 3.542065  | 10.974814 |
|                                                                              | B | 5.672825 | 6.844017  | 7.711820  |
|                                                                              | H | 5.983237 | 6.396080  | 6.655657  |
|                                                                              | B | 5.803569 | 6.248977  | 9.260197  |
|                                                                              | B | 4.197943 | 6.821392  | 8.616297  |
|                                                                              | H | 3.222622 | 6.249699  | 8.237997  |
|                                                                              | B | 4.990516 | 8.348617  | 8.084085  |
|                                                                              | H | 4.784170 | 9.132199  | 7.208373  |
|                                                                              | B | 6.614236 | 7.788610  | 8.798059  |
|                                                                              | H | 7.758909 | 8.009690  | 8.538366  |
|                                                                              | B | 6.198012 | 7.404008  | 10.487082 |
|                                                                              | B | 4.545181 | 6.845146  | 10.399812 |
|                                                                              | H | 3.994879 | 6.088102  | 11.137901 |
|                                                                              | B | 3.974229 | 8.352120  | 9.561038  |
|                                                                              | H | 2.899370 | 8.867684  | 9.571276  |
|                                                                              | B | 5.633338 | 9.114151  | 9.628988  |
|                                                                              | H | 6.103137 | 10.203143 | 9.506828  |
|                                                                              | B | 4.843295 | 8.405163  | 11.060804 |
|                                                                              | H | 4.443320 | 8.742686  | 12.125761 |
|                                                                              | H | 5.889694 | 9.152522  | 10.989709 |
| $[\text{B}_{10}\text{H}_8\text{O}_2\text{CCH}_3^*\text{H}^{fac}]^0$<br>Iso 2 |   |          |           |           |

|                                                                                                         |   |          |           |           |
|---------------------------------------------------------------------------------------------------------|---|----------|-----------|-----------|
|                                                                                                         | O | 7.302128 | 6.668642  | 11.215339 |
|                                                                                                         | O | 6.573631 | 5.122910  | 9.809620  |
|                                                                                                         | C | 7.352635 | 5.460271  | 10.765529 |
|                                                                                                         | C | 8.274241 | 4.484995  | 11.371796 |
|                                                                                                         | H | 7.738210 | 3.991545  | 12.190593 |
|                                                                                                         | H | 9.145908 | 4.994142  | 11.781857 |
|                                                                                                         | H | 8.561769 | 3.732781  | 10.637863 |
|                                                                                                         | B | 5.632842 | 6.820633  | 7.749408  |
|                                                                                                         | H | 5.911476 | 6.284585  | 6.725771  |
|                                                                                                         | B | 5.762521 | 6.274374  | 9.313330  |
|                                                                                                         | B | 4.188351 | 6.844238  | 8.707189  |
|                                                                                                         | H | 3.186909 | 6.287826  | 8.378341  |
|                                                                                                         | B | 5.013984 | 8.358965  | 8.072389  |
|                                                                                                         | H | 4.775346 | 9.104084  | 7.170585  |
|                                                                                                         | B | 6.605799 | 7.824925  | 8.751663  |
|                                                                                                         | H | 7.752491 | 7.998324  | 8.464171  |
|                                                                                                         | B | 6.253432 | 7.465244  | 10.539549 |
|                                                                                                         | B | 4.557970 | 6.897731  | 10.468918 |
|                                                                                                         | H | 3.994035 | 6.131258  | 11.188064 |
|                                                                                                         | B | 4.064496 | 8.428243  | 9.615995  |
|                                                                                                         | H | 3.018096 | 8.988769  | 9.722909  |
|                                                                                                         | B | 5.668459 | 9.154620  | 9.518067  |
|                                                                                                         | H | 6.137241 | 10.243203 | 9.593800  |
|                                                                                                         | B | 4.939499 | 8.459473  | 11.104570 |
|                                                                                                         | H | 4.537628 | 8.949637  | 12.105819 |
|                                                                                                         | H | 6.217143 | 8.636981  | 11.235077 |
| [B <sub>10</sub> H <sub>8</sub> O <sub>2</sub> CCH <sub>3</sub> *H <sup>fac</sup> ] <sup>0</sup><br>TS2 |   |          |           |           |
|                                                                                                         | O | 7.277808 | 6.738907  | 11.190421 |
|                                                                                                         | O | 6.576827 | 5.148476  | 9.808249  |



|                                                                                                           |   |          |           |           |
|-----------------------------------------------------------------------------------------------------------|---|----------|-----------|-----------|
|                                                                                                           | C | 7.338422 | 5.522850  | 10.771150 |
|                                                                                                           | C | 8.252675 | 4.561706  | 11.413178 |
|                                                                                                           | H | 7.686241 | 4.037396  | 12.191161 |
|                                                                                                           | H | 9.087316 | 5.085157  | 11.877909 |
|                                                                                                           | H | 8.600215 | 3.829696  | 10.684164 |
|                                                                                                           | B | 5.582272 | 6.826170  | 7.710684  |
|                                                                                                           | H | 5.805580 | 6.314896  | 6.661627  |
|                                                                                                           | B | 5.766365 | 6.292295  | 9.277041  |
|                                                                                                           | B | 4.154796 | 6.885594  | 8.658491  |
|                                                                                                           | H | 3.155011 | 6.342424  | 8.305549  |
|                                                                                                           | B | 5.019605 | 8.388336  | 8.063057  |
|                                                                                                           | H | 4.745200 | 9.206881  | 7.244979  |
|                                                                                                           | B | 6.586967 | 7.795679  | 8.699662  |
|                                                                                                           | H | 7.736981 | 7.982452  | 8.439867  |
|                                                                                                           | B | 6.203472 | 7.483717  | 10.477479 |
|                                                                                                           | B | 4.535323 | 6.897474  | 10.463070 |
|                                                                                                           | H | 3.937842 | 6.118115  | 11.137618 |
|                                                                                                           | B | 3.895194 | 8.340123  | 9.680614  |
|                                                                                                           | H | 2.849358 | 8.905479  | 9.698934  |
|                                                                                                           | B | 5.907890 | 9.062773  | 9.718656  |
|                                                                                                           | H | 6.358245 | 10.162182 | 9.739048  |
|                                                                                                           | B | 4.961287 | 8.397697  | 11.115170 |
|                                                                                                           | H | 4.753654 | 8.919855  | 12.158782 |
|                                                                                                           | H | 4.634322 | 9.422963  | 9.434950  |
| [B <sub>10</sub> H <sub>8</sub> O <sub>2</sub> CCH <sub>3</sub> *H <sup>fac</sup> ] <sup>0</sup><br>Iso 3 |   |          |           |           |
|                                                                                                           | O | 7.282372 | 6.649508  | 11.204427 |
|                                                                                                           | O | 6.601900 | 5.086383  | 9.789555  |
|                                                                                                           | C | 7.348458 | 5.441232  | 10.773349 |
|                                                                                                           | C | 8.244433 | 4.464678  | 11.418041 |

|                                                                                                           |   |          |           |           |
|-----------------------------------------------------------------------------------------------------------|---|----------|-----------|-----------|
|                                                                                                           | H | 7.660449 | 3.932639  | 12.177586 |
|                                                                                                           | H | 9.073701 | 4.976141  | 11.905155 |
|                                                                                                           | H | 8.601153 | 3.741022  | 10.685093 |
|                                                                                                           | B | 5.546660 | 6.759988  | 7.719741  |
|                                                                                                           | H | 5.789265 | 6.321140  | 6.643061  |
|                                                                                                           | B | 5.786683 | 6.232180  | 9.290393  |
|                                                                                                           | B | 4.165806 | 6.716219  | 8.681011  |
|                                                                                                           | H | 3.139844 | 6.222505  | 8.333701  |
|                                                                                                           | B | 5.036562 | 8.350552  | 8.072633  |
|                                                                                                           | H | 4.896552 | 9.018824  | 7.090865  |
|                                                                                                           | B | 6.586489 | 7.744629  | 8.724535  |
|                                                                                                           | H | 7.710278 | 7.947979  | 8.377457  |
|                                                                                                           | B | 6.245143 | 7.429004  | 10.465922 |
|                                                                                                           | B | 4.535771 | 6.861439  | 10.425335 |
|                                                                                                           | H | 3.952590 | 6.098616  | 11.134922 |
|                                                                                                           | B | 4.012603 | 8.408094  | 9.696279  |
|                                                                                                           | H | 2.972160 | 8.964695  | 9.889771  |
|                                                                                                           | B | 5.861017 | 9.028404  | 9.738524  |
|                                                                                                           | H | 6.297880 | 10.134701 | 9.694564  |
|                                                                                                           | B | 5.031200 | 8.412808  | 11.066474 |
|                                                                                                           | H | 4.774233 | 8.866388  | 12.133728 |
|                                                                                                           | H | 3.960147 | 8.972634  | 8.506648  |
| [B <sub>10</sub> H <sub>8</sub> O <sub>2</sub> CCH <sub>3</sub> *H <sup>fac</sup> ] <sup>0</sup><br>Iso 4 |   |          |           |           |
|                                                                                                           | O | 7.297108 | 6.655050  | 11.196090 |
|                                                                                                           | O | 6.560714 | 5.090497  | 9.807792  |
|                                                                                                           | C | 7.337787 | 5.442853  | 10.767707 |
|                                                                                                           | C | 8.241704 | 4.460978  | 11.392934 |
|                                                                                                           | H | 7.669146 | 3.927918  | 12.160409 |
|                                                                                                           | H | 9.081090 | 4.967704  | 11.867377 |

|                                                                                                           |   |          |           |           |
|-----------------------------------------------------------------------------------------------------------|---|----------|-----------|-----------|
|                                                                                                           | H | 8.582926 | 3.738628  | 10.651350 |
|                                                                                                           | B | 5.595131 | 6.781805  | 7.733960  |
|                                                                                                           | H | 5.800489 | 6.315449  | 6.662310  |
|                                                                                                           | B | 5.771144 | 6.256151  | 9.306544  |
|                                                                                                           | B | 4.171862 | 6.843147  | 8.681063  |
|                                                                                                           | H | 3.168076 | 6.316170  | 8.316848  |
|                                                                                                           | B | 5.085920 | 8.365214  | 8.040886  |
|                                                                                                           | H | 4.906313 | 9.060719  | 7.089097  |
|                                                                                                           | B | 6.631203 | 7.738475  | 8.727685  |
|                                                                                                           | H | 7.779738 | 7.894126  | 8.443178  |
|                                                                                                           | B | 6.246068 | 7.440120  | 10.484553 |
|                                                                                                           | B | 4.548149 | 6.890274  | 10.454945 |
|                                                                                                           | H | 3.937683 | 6.113633  | 11.123687 |
|                                                                                                           | B | 3.995955 | 8.405157  | 9.720905  |
|                                                                                                           | H | 2.962939 | 8.994057  | 9.753370  |
|                                                                                                           | B | 5.894481 | 9.047112  | 9.745306  |
|                                                                                                           | H | 6.327850 | 10.153041 | 9.726063  |
|                                                                                                           | B | 5.032420 | 8.417158  | 11.089760 |
|                                                                                                           | H | 4.828209 | 8.900715  | 12.155955 |
|                                                                                                           | H | 4.611513 | 9.296670  | 8.825830  |
| [B <sub>10</sub> H <sub>8</sub> O <sub>2</sub> CCH <sub>3</sub> *H <sup>fac</sup> ] <sup>0</sup><br>Iso 5 |   |          |           |           |
|                                                                                                           | O | 7.305821 | 6.668289  | 11.186799 |
|                                                                                                           | O | 6.585041 | 5.097110  | 9.798089  |
|                                                                                                           | C | 7.348146 | 5.455136  | 10.769083 |
|                                                                                                           | C | 8.240503 | 4.473338  | 11.410816 |
|                                                                                                           | H | 7.652624 | 3.939839  | 12.166398 |
|                                                                                                           | H | 9.070675 | 4.979874  | 11.901246 |
|                                                                                                           | H | 8.595260 | 3.751038  | 10.675466 |
|                                                                                                           | B | 5.574774 | 6.769371  | 7.708326  |

|                                                                                                           |   |          |           |           |
|-----------------------------------------------------------------------------------------------------------|---|----------|-----------|-----------|
|                                                                                                           | H | 5.786603 | 6.260278  | 6.655798  |
|                                                                                                           | B | 5.763944 | 6.237135  | 9.289162  |
|                                                                                                           | B | 4.165724 | 6.827322  | 8.700738  |
|                                                                                                           | H | 3.143824 | 6.341162  | 8.328080  |
|                                                                                                           | B | 4.958324 | 8.328360  | 8.051411  |
|                                                                                                           | H | 4.736496 | 9.107964  | 7.180958  |
|                                                                                                           | B | 6.674259 | 7.655138  | 8.685087  |
|                                                                                                           | H | 7.815318 | 7.810275  | 8.387710  |
|                                                                                                           | B | 6.250927 | 7.447532  | 10.468082 |
|                                                                                                           | B | 4.541145 | 6.857423  | 10.448915 |
|                                                                                                           | H | 4.003915 | 6.056141  | 11.152004 |
|                                                                                                           | B | 4.056923 | 8.400108  | 9.646059  |
|                                                                                                           | H | 3.018165 | 8.985961  | 9.651588  |
|                                                                                                           | B | 5.796340 | 9.061072  | 9.753244  |
|                                                                                                           | H | 6.215844 | 10.170767 | 9.848746  |
|                                                                                                           | B | 4.986612 | 8.361152  | 11.083250 |
|                                                                                                           | H | 4.824515 | 8.900733  | 12.127942 |
|                                                                                                           | H | 6.223069 | 8.987297  | 8.485014  |
| [B <sub>10</sub> H <sub>8</sub> O <sub>2</sub> CCH <sub>3</sub> *H <sup>fac</sup> ] <sup>0</sup><br>Iso 6 |   |          |           |           |
|                                                                                                           | O | 7.285835 | 6.604258  | 11.256894 |
|                                                                                                           | O | 6.592929 | 5.070512  | 9.809193  |
|                                                                                                           | C | 7.340321 | 5.395406  | 10.794185 |
|                                                                                                           | C | 8.232705 | 4.410428  | 11.426227 |
|                                                                                                           | H | 7.668145 | 3.927183  | 12.231996 |
|                                                                                                           | H | 9.098778 | 4.910010  | 11.859460 |
|                                                                                                           | H | 8.529874 | 3.652119  | 10.702598 |
|                                                                                                           | B | 5.569355 | 6.758984  | 7.720330  |
|                                                                                                           | H | 5.838683 | 6.252913  | 6.681568  |
|                                                                                                           | B | 5.801955 | 6.244540  | 9.303913  |

|  |   |          |           |           |
|--|---|----------|-----------|-----------|
|  | B | 4.183263 | 6.820378  | 8.712379  |
|  | H | 3.205410 | 6.253792  | 8.334069  |
|  | B | 5.041354 | 8.334866  | 8.104589  |
|  | H | 4.784939 | 9.095555  | 7.222391  |
|  | B | 6.660623 | 7.708891  | 8.634398  |
|  | H | 7.773322 | 7.779850  | 8.209299  |
|  | B | 6.249167 | 7.389592  | 10.569307 |
|  | B | 4.542156 | 6.860196  | 10.460640 |
|  | H | 4.047234 | 6.032945  | 11.165033 |
|  | B | 4.063012 | 8.366307  | 9.646940  |
|  | H | 3.047003 | 8.990843  | 9.621105  |
|  | B | 5.723418 | 9.094207  | 9.641690  |
|  | H | 6.163477 | 10.198286 | 9.665177  |
|  | B | 5.016243 | 8.391991  | 11.074589 |
|  | H | 4.806531 | 8.908725  | 12.124854 |
|  | H | 7.012079 | 8.434820  | 9.663741  |

**Optimized equilibrium model structures used for analysis of the mechanism for the protonation of  $[\text{B}_{10}\text{H}_8\text{O}_2\text{CCH}_3]^-$**

| Compound                         | Atom | x        | y        | z         |
|----------------------------------|------|----------|----------|-----------|
| $\text{CF}_3\text{SO}_3\text{H}$ |      |          |          |           |
|                                  | S    | 1.849032 | 2.796840 | 11.451578 |
|                                  | O    | 0.886440 | 2.931307 | 12.709077 |
|                                  | O    | 1.782444 | 4.041592 | 10.731160 |
|                                  | O    | 1.677709 | 1.511331 | 10.815756 |
|                                  | H    | 0.604992 | 2.055318 | 13.041152 |
|                                  | C    | 3.492373 | 2.756880 | 12.313184 |
|                                  | F    | 3.673316 | 3.878385 | 12.998016 |

|             |   |          |           |           |
|-------------|---|----------|-----------|-----------|
|             | F | 3.530683 | 1.717889  | 13.141650 |
|             | F | 4.446525 | 2.632799  | 11.397750 |
| <b>Comp</b> |   |          |           |           |
|             | O | 7.397099 | 6.884796  | 11.074299 |
|             | O | 6.209599 | 5.191881  | 10.264510 |
|             | C | 7.086522 | 5.640430  | 11.085498 |
|             | C | 7.713565 | 4.730121  | 12.067522 |
|             | H | 7.089345 | 4.731098  | 12.967963 |
|             | H | 8.708220 | 5.087782  | 12.332621 |
|             | H | 7.753403 | 3.715858  | 11.670702 |
|             | B | 5.619984 | 6.315706  | 7.673865  |
|             | H | 5.627017 | 5.453970  | 6.847404  |
|             | B | 5.727160 | 6.286539  | 9.339281  |
|             | B | 4.313772 | 7.059092  | 8.506226  |
|             | H | 3.183406 | 6.727359  | 8.287795  |
|             | B | 5.539034 | 8.011183  | 7.512312  |
|             | H | 5.459155 | 8.491588  | 6.416676  |
|             | B | 6.911529 | 7.210900  | 8.347649  |
|             | H | 8.052332 | 6.959431  | 8.074188  |
|             | B | 6.554202 | 7.638447  | 10.071632 |
|             | B | 4.760373 | 7.566902  | 10.183211 |
|             | H | 4.051471 | 7.221857  | 11.086462 |
|             | B | 4.678389 | 8.810014  | 8.893325  |
|             | H | 3.821778 | 9.606665  | 8.598299  |
|             | B | 6.499598 | 8.919207  | 8.781599  |
|             | H | 7.236141 | 9.800519  | 8.442938  |
|             | B | 5.653952 | 9.027540  | 10.272836 |
|             | H | 5.656177 | 9.875701  | 11.112544 |
|             | S | 2.493916 | 12.048007 | 10.206707 |

|           |   |          |           |           |
|-----------|---|----------|-----------|-----------|
|           | O | 2.888071 | 10.621833 | 10.742105 |
|           | O | 1.566660 | 12.620588 | 11.152089 |
|           | O | 2.227175 | 12.025494 | 8.786090  |
|           | H | 3.407807 | 10.100912 | 10.070004 |
|           | C | 4.100665 | 12.951137 | 10.417699 |
|           | F | 4.497398 | 12.892876 | 11.684521 |
|           | F | 5.027207 | 12.405998 | 9.637509  |
|           | F | 3.920640 | 14.223313 | 10.069357 |
| <b>TS</b> |   |          |           |           |
|           | O | 6.573567 | 6.615451  | 11.428391 |
|           | O | 5.835959 | 5.134041  | 9.947339  |
|           | C | 6.419483 | 5.394218  | 11.060089 |
|           | C | 6.943156 | 4.298125  | 11.899007 |
|           | H | 7.988096 | 4.133790  | 11.613180 |
|           | H | 6.381439 | 3.382354  | 11.718017 |
|           | H | 6.910945 | 4.580761  | 12.951461 |
|           | B | 5.789180 | 6.887030  | 7.632655  |
|           | H | 6.110934 | 6.320401  | 6.635752  |
|           | B | 5.486045 | 6.399209  | 9.212667  |
|           | B | 4.241904 | 7.276764  | 8.237530  |
|           | H | 3.251436 | 6.972715  | 7.642076  |
|           | B | 5.528302 | 8.560465  | 7.913097  |
|           | H | 5.673583 | 9.308711  | 6.990424  |
|           | B | 6.759212 | 7.588265  | 8.835704  |
|           | H | 7.952808 | 7.506565  | 8.817711  |
|           | B | 5.958655 | 7.551820  | 10.430983 |
|           | B | 4.196129 | 7.368938  | 10.031503 |
|           | H | 3.364468 | 6.779181  | 10.655478 |
|           | B | 4.224714 | 8.880813  | 9.119731  |

|  |   |          |           |           |
|--|---|----------|-----------|-----------|
|  | H | 3.381820 | 9.677770  | 8.857718  |
|  | B | 6.098365 | 9.114915  | 9.577169  |
|  | H | 6.843710 | 10.042462 | 9.610824  |
|  | B | 4.851403 | 8.779278  | 10.758426 |
|  | H | 4.530205 | 9.191901  | 11.825166 |
|  | S | 3.672662 | 12.336346 | 10.649702 |
|  | O | 4.922893 | 11.556977 | 10.352547 |
|  | O | 3.909558 | 13.451290 | 11.560883 |
|  | O | 2.496026 | 11.507637 | 10.885598 |
|  | H | 4.963914 | 10.159459 | 10.231828 |
|  | C | 3.354956 | 13.153677 | 9.018121  |
|  | F | 4.385557 | 13.933124 | 8.669515  |
|  | F | 3.168940 | 12.248424 | 8.053158  |
|  | F | 2.257890 | 13.918951 | 9.092881  |

**Optimized equilibrium model structures for supramolecular associates of  $\text{CF}_3\text{SO}_3^-$**

| Compound                   | Atom | x        | y        | z         |
|----------------------------|------|----------|----------|-----------|
| $\text{CF}_3\text{SO}_3^-$ |      |          |          |           |
|                            | S    | 1.771385 | 2.812592 | 11.530485 |
|                            | O    | 0.876202 | 2.919248 | 12.691528 |
|                            | O    | 1.842901 | 4.010811 | 10.682043 |
|                            | O    | 1.707991 | 1.535077 | 10.805980 |
|                            | C    | 3.453186 | 2.758078 | 12.308937 |
|                            | F    | 3.699598 | 3.872255 | 13.017556 |
|                            | F    | 3.571173 | 1.711969 | 13.142809 |
|                            | F    | 4.416086 | 2.646992 | 11.378833 |

| Compound | Atom | x | y | z |
|----------|------|---|---|---|
|----------|------|---|---|---|



|                                                                |   |           |          |           |
|----------------------------------------------------------------|---|-----------|----------|-----------|
| CF <sub>3</sub> SO <sub>3</sub> <sup>-</sup> _H <sub>2</sub> O |   |           |          |           |
|                                                                | S | 1.297583  | 4.820432 | 12.186725 |
|                                                                | O | 1.857764  | 3.687278 | 12.936505 |
|                                                                | O | 0.235108  | 4.447542 | 11.230328 |
|                                                                | O | 2.266214  | 5.800727 | 11.687927 |
|                                                                | C | 0.362681  | 5.759760 | 13.480772 |
|                                                                | F | -0.592180 | 4.996579 | 14.032643 |
|                                                                | F | 1.179130  | 6.170904 | 14.462884 |
|                                                                | F | -0.228878 | 6.844202 | 12.957703 |
|                                                                | O | -0.315412 | 1.699884 | 11.849410 |
|                                                                | H | 0.421147  | 1.646657 | 12.469471 |
|                                                                | H | -0.266819 | 2.618950 | 11.537357 |

|                                                                |      |           |          |           |
|----------------------------------------------------------------|------|-----------|----------|-----------|
| Compound                                                       | Atom | x         | y        | z         |
| CF <sub>3</sub> SO <sub>3</sub> <sup>-</sup> _H <sub>3</sub> O |      |           |          |           |
|                                                                | S    | 1.232304  | 3.140503 | 11.872670 |
|                                                                | O    | 0.888656  | 4.315136 | 12.837227 |
|                                                                | O    | 1.438424  | 3.666676 | 10.544286 |
|                                                                | O    | 0.371562  | 1.999841 | 12.115500 |
|                                                                | C    | 2.903971  | 2.656137 | 12.509390 |
|                                                                | F    | 3.753298  | 3.673194 | 12.401285 |
|                                                                | F    | 2.805713  | 2.302226 | 13.791013 |
|                                                                | F    | 3.359045  | 1.625051 | 11.802926 |
|                                                                | O    | -0.297732 | 3.572434 | 14.930755 |
|                                                                | H    | 0.174457  | 3.722836 | 15.761780 |
|                                                                | H    | -0.619297 | 2.660045 | 14.952840 |
|                                                                | H    | 0.406089  | 3.992990 | 13.693686 |

|          |      |   |   |   |
|----------|------|---|---|---|
| Compound | Atom | x | y | z |
|----------|------|---|---|---|

|                                                                                 |   |           |           |           |
|---------------------------------------------------------------------------------|---|-----------|-----------|-----------|
| CF <sub>3</sub> SO <sub>3</sub> <sup>-</sup> _CF <sub>3</sub> SO <sub>3</sub> H |   |           |           |           |
|                                                                                 | S | 1.337071  | 3.010722  | 11.702255 |
|                                                                                 | O | 0.744906  | 3.483374  | 12.994035 |
|                                                                                 | O | 1.716548  | 4.114842  | 10.825511 |
|                                                                                 | O | 0.637162  | 1.880708  | 11.102692 |
|                                                                                 | C | 2.955808  | 2.310249  | 12.268482 |
|                                                                                 | F | 3.713993  | 3.259950  | 12.831578 |
|                                                                                 | F | 2.768340  | 1.338637  | 13.165833 |
|                                                                                 | F | 3.630013  | 1.799875  | 11.229211 |
|                                                                                 | O | -0.047577 | 0.111003  | 13.949303 |
|                                                                                 | O | -1.473936 | 0.502294  | 15.988297 |
|                                                                                 | S | -1.022079 | 0.899811  | 14.671709 |
|                                                                                 | O | -0.654467 | 2.404275  | 14.704516 |
|                                                                                 | H | -0.051321 | 2.754761  | 13.913852 |
|                                                                                 | C | -2.541692 | 0.938873  | 13.611461 |
|                                                                                 | F | -3.496081 | 1.659971  | 14.199528 |
|                                                                                 | F | -2.262640 | 1.472305  | 12.426080 |
|                                                                                 | F | -2.985540 | -0.307000 | 13.437974 |
